# Supplementary material for: Microwave- and Ultrasound-Assisted Extraction of Cannabinoids and Terpenes from Cannabis Using Response Surface Methodology
Source: MDPI journal article supplement (doi:10.3390/molecules27248803), 2022-12-12
Supplement: s1 [file s1]

**Table S1.** Ultrasound-assisted extraction of cannabis using model B (sample (g) solvent (g)<sup>-1</sup>, duty cycle (%), and extraction temperature (°C) as independent parameters)

| Response/dependent variables |                | Regression model effect parameters |                |                |                |                 |                 |                 |                 |                 |                 |
|------------------------------|----------------|------------------------------------|----------------|----------------|----------------|-----------------|-----------------|-----------------|-----------------|-----------------|-----------------|
|                              |                | Intercept                          | Linear         |                |                |                 | Interaction     |                 |                 | Quadratic       |                 |
|                              |                | β <sub>0</sub>                     | β <sub>1</sub> | β <sub>3</sub> | β <sub>4</sub> | β <sub>13</sub> | β <sub>14</sub> | β <sub>34</sub> | β <sub>11</sub> | β <sub>33</sub> | β <sub>44</sub> |
| THC                          | Coefficient    | 0.69                               | 0.25           | 0.05           | 0.02           | 0.01            | 0.001           | -0.002          | -0.005          | 0.02            | 0.03            |
|                              | <i>p value</i> | <.0001*                            | <.0001*        | 0.2            | 0.53           | 0.83            | 0.99            | 0.97            | 0.88            | 0.52            | 0.37            |
| THCA                         | Coefficient    | 23.68                              | 4.82           | 0.51           | 0.28           | -0.52           | -0.25           | -0.1            | -1.9            | 0.95            | 1.03            |
|                              | <i>p value</i> | <.0001*                            | 0.001*         | 0.68           | 0.82           | 0.73            | 0.87            | 0.95            | 0.1             | 0.41            | 0.36            |
| Total THC                    | Coefficient    | 20.76                              | 4.48           | 0.5            | 0.27           | -0.44           | -0.22           | -0.1            | -1.46           | 1.06            | 1.15            |
|                              | <i>p value</i> | <.0001*                            | 0.0005*        | 0.65           | 0.81           | 0.74            | 0.87            | 0.94            | 0.16            | 0.3             | 0.26            |
| CBG                          | Coefficient    | 0.14                               | 0.04           | 0.01           | 0.003          | -0.003          | -0.002          | 0.001           | -0.01           | 0.003           | 0.004           |
|                              | <i>p value</i> | <.0001*                            | <.0001*        | 0.37           | 0.67           | 0.71            | 0.82            | 0.94            | 0.2             | 0.64            | 0.5             |
| CBGA                         | Coefficient    | 0.34                               | 0.12           | 0.01           | 0.001          | -0.003          | 0.002           | 0.01            | -0.01           | -0.002          | 0.01            |
|                              | <i>p value</i> | <.0001*                            | <.0001*        | 0.52           | 0.94           | 0.88            | 0.93            | 0.66            | 0.54            | 0.89            | 0.42            |
| Total CBG                    | Coefficient    | 0.41                               | 0.15           | 0.02           | 0.01           | -0.01           | 0.003           | 0.01            | -0.01           | 0.01            | 0.02            |
|                              | <i>p value</i> | <.0001*                            | <.0001*        | 0.46           | 0.80           | 0.83            | 0.9             | 0.75            | 0.63            | 0.66            | 0.25            |
| THCVA                        | Coefficient    | 1.32                               | 0.4            | 0.06           | 0.03           | -0.01           | 0.002           | -0.001          | -0.06           | 0.05            | 0.06            |
|                              | <i>p value</i> | <.0001*                            | <.0001*        | 0.39           | 0.62           | 0.87            | 0.98            | 0.99            | 0.39            | 0.42            | 0.34            |
| CBCA                         | Coefficient    | 0.12                               | 0.04           | -0.002         | 0.01           | -0.004          | 0.01            | -0.004          | -0.002          | 0.004           | 0.01            |
|                              | <i>p value</i> | <.0001*                            | <.0001*        | 0.78           | 0.47           | 0.63            | 0.37            | 0.63            | 0.72            | 0.57            | 0.27            |
| Total terpenes               | Coefficient    | 0.95                               | 0.2            | 0.001          | 0.003          | -0.02           | -0.01           | 0.003           | -0.02           | 0.04            | 0.05            |

|       |                |         |         |      |      |       |       |      |       |      |      |
|-------|----------------|---------|---------|------|------|-------|-------|------|-------|------|------|
|       | <i>p value</i> | <.0001* | 0.002*  | 0.98 | 0.95 | 0.81  | 0.83  | 0.96 | 0.69  | 0.39 | 0.33 |
| Yield | Coefficient    | 24.59   | 4.01    | 0.47 | 0.36 | -0.29 | -0.12 | -0.1 | -1.64 | 1.21 | 1.32 |
|       | <i>p value</i> | <.0001* | 0.0067* | 0.73 | 0.79 | 0.86  | 0.94  | 0.95 | 0.19  | 0.33 | 0.29 |

---

**Table S2.** Ultrasound-assisted extraction of cannabis using model C (sample (g) solvent (g)<sup>-1</sup>, extraction time (min), and extraction temperature (°C) as independent parameters).

| Response/dependent variables |                | Regression model effect parameters |                |                |                |                 |                 |                 |                 |                 |                 |
|------------------------------|----------------|------------------------------------|----------------|----------------|----------------|-----------------|-----------------|-----------------|-----------------|-----------------|-----------------|
|                              |                | Intercept                          | Linear         |                |                |                 | Interaction     |                 |                 | Quadratic       |                 |
|                              |                | β <sub>0</sub>                     | β <sub>1</sub> | β <sub>2</sub> | β <sub>4</sub> | β <sub>12</sub> | β <sub>14</sub> | β <sub>24</sub> | β <sub>11</sub> | β <sub>22</sub> | β <sub>44</sub> |
| THC                          | Coefficient    | 0.77                               | 0.25           | 0.10           | 0.02           | 0.02            | 0.001           | -0.001          | -0.01           | -0.07           | 0.02            |
|                              | <i>p value</i> | <.0001*                            | <.0001*        | 0.002*         | 0.41           | 0.64            | 0.99            | 0.99            | 0.59            | 0.01*           | 0.39            |
| THCA                         | Coefficient    | 26.98                              | 4.82           | 2.99           | 0.28           | -0.94           | -0.25           | 0.02            | -2.24           | -2.63           | 0.69            |
|                              | <i>p value</i> | <.0001*                            | <.0001*        | 0.002*         | 0.74           | 0.37            | 0.82            | 0.99            | 0.01*           | 0.01*           | 0.38            |
| Total THC                    | Coefficient    | 23.73                              | 4.48           | 2.72           | 0.27           | -0.82           | -0.22           | 0.01            | -1.77           | -2.16           | 0.84            |
|                              | <i>p value</i> | <.0001*                            | <.0001*        | 0.003*         | 0.73           | 0.41            | 0.83            | 0.99            | 0.02*           | 0.01*           | 0.26            |
| CBG                          | Coefficient    | 0.15                               | 0.04           | 0.02           | 0.002          | -0.002          | -0.002          | 0.002           | -0.01           | -0.02           | 0.002           |
|                              | <i>p value</i> | <.0001*                            | <.0001*        | 0.001*         | 0.49           | 0.71            | 0.71            | 0.71            | 0.01*           | 0.01*           | 0.53            |
| CBGA                         | Coefficient    | 0.37                               | 0.12           | 0.03           | 0.001          | -0.003          | 0.002           | -0.01           | -0.01           | -0.04           | 0.01            |
|                              | <i>p value</i> | <.0001*                            | <.0001*        | 0.03*          | 0.93           | 0.85            | 0.91            | 0.62            | 0.29            | 0.01*           | 0.44            |
| Total CBG                    | Coefficient    | 0.46                               | 0.15           | 0.04           | 0.01           | -0.01           | 0.003           | -0.004          | -0.01           | -0.04           | 0.02            |
|                              | <i>p value</i> | <.0001*                            | <.0001*        | 0.01*          | 0.74           | 0.78            | 0.88            | 0.83            | 0.35            | 0.01*           | 0.25            |
| THCVA                        | Coefficient    | 1.48                               | 0.4            | 0.21           | 0.03           | -0.06           | 0.002           | -0.001          | -0.07           | -0.13           | 0.04            |
|                              | <i>p value</i> | <.0001*                            | <.0001*        | 0.001*         | 0.45           | 0.32            | 0.97            | 0.99            | 0.09            | 0.01*           | 0.29            |
| CBCA                         | Coefficient    | 0.14                               | 0.04           | 0.02           | 0.01           | -0.003          | 0.01            | -0.01           | 0.004           | -0.01           | 0.01            |
|                              | <i>p value</i> | <.0001*                            | <.0001*        | 0.01*          | 0.36           | 0.66            | 0.26            | 0.44            | 0.45            | 0.02*           | 0.27            |
| Total terpenes               | Coefficient    | 1.08                               | 0.20           | 0.08           | 0.003          | -0.01           | -0.01           | 0.02            | -0.03           | -0.1            | 0.04            |

|       |                |         |        |       |      |       |       |       |      |       |      |
|-------|----------------|---------|--------|-------|------|-------|-------|-------|------|-------|------|
|       | <i>p value</i> | <.0001* | 0.001* | 0.13  | 0.94 | 0.91  | 0.81  | 0.76  | 0.45 | 0.04* | 0.41 |
| Yield | Coefficient    | 27.99   | 4.01   | 2.64  | 0.36 | -0.21 | -0.12 | -0.12 | -2   | -2.47 | 0.97 |
|       | <i>p value</i> | <.0001* | 0.001* | 0.02* | 0.75 | 0.88  | 0.93  | 0.93  | 0.06 | 0.02* | 0.34 |

---

Effects are statistically significant if *p value* \* < 0.05

**Table S3.** Ultrasound-assisted extraction of cannabis using model D (sample (g) solvent (g)<sup>-1</sup>, extraction time (min), and duty cycle (%)) as independent parameters).

| Response/dependent variables |                | Regression model effect parameters |           |           |           |              |              |              |              |              |              |
|------------------------------|----------------|------------------------------------|-----------|-----------|-----------|--------------|--------------|--------------|--------------|--------------|--------------|
|                              |                | Intercept                          | Linear    |           |           |              | Interaction  |              |              | Quadratic    |              |
|                              |                | $\beta_0$                          | $\beta_1$ | $\beta_2$ | $\beta_3$ | $\beta_{12}$ | $\beta_{13}$ | $\beta_{23}$ | $\beta_{11}$ | $\beta_{22}$ | $\beta_{33}$ |
| THC                          | Coefficient    | 0.78                               | 0.25      | 0.1       | 0.05      | 0.02         | 0.01         | 0.01         | -0.01        | -0.07        | 0.01         |
|                              | <i>p value</i> | <.0001*                            | <.0001*   | 0.001*    | 0.08      | 0.62         | 0.77         | 0.8          | 0.55         | 0.01*        | 0.62         |
| THCA                         | Coefficient    | 27.07                              | 4.82      | 2.99      | 0.51      | -0.95        | -0.52        | 0.11         | -2.25        | -2.64        | 0.6          |
|                              | <i>p value</i> | <.0001*                            | <.0001*   | 0.002*    | 0.55      | 0.37         | 0.62         | 0.91         | 0.01*        | 0.01*        | 0.45         |
| Total THC                    | Coefficient    | 23.82                              | 4.48      | 2.72      | 0.5       | -0.82        | -0.44        | 0.11         | -1.78        | -2.17        | 0.74         |
|                              | <i>p value</i> | <.0001*                            | <.0001*   | 0.002*    | 0.54      | 0.41         | 0.65         | 0.91         | 0.02*        | 0.01*        | 0.31         |
| CBG                          | Coefficient    | 0.16                               | 0.04      | 0.02      | 0.01      | 0.001        | -0.002       | -0.003       | -0.01        | -0.02        | 0.001        |
|                              | <i>p value</i> | <.0001*                            | <.0001*   | 0.001*    | 0.13      | 0.7          | 0.53         | 0.9          | 0.01*        | 0.02*        | 0.78         |
| CBGA                         | Coefficient    | 0.39                               | 0.12      | 0.03      | 0.01      | -0.003       | -0.003       | -0.003       | -0.01        | -0.04        | -0.01        |
|                              | <i>p value</i> | <.0001*                            | <.0001*   | 0.03*     | 0.4       | 0.85         | 0.85         | 0.85         | 0.24         | 0.01*        | 0.56         |
| Total CBG                    | Coefficient    | 0.47                               | 0.15      | 0.04      | 0.02      | -0.01        | -0.01        | -0.003       | -0.02        | -0.04        | 0.002        |
|                              | <i>p value</i> | <.0001*                            | <.0001*   | 0.01*     | 0.35      | 0.78         | 0.78         | 0.88         | 0.31         | 0.01*        | 0.88         |
| THCVA                        | Coefficient    | 1.49                               | 0.4       | 0.21      | 0.06      | -0.07        | -0.01        | -0.002       | -0.07        | -0.12        | 0.03         |
|                              | <i>p value</i> | <.0001*                            | <.0001*   | 0.01*     | 0.19      | 0.31         | 0.79         | 0.97         | 0.08         | 0.01*        | 0.41         |
| CBCA                         | Coefficient    | 0.14                               | 0.04      | 0.02      | -0.002    | -0.003       | -0.004       | 0.004        | -0.004       | -0.01        | 0.002        |
|                              | <i>p value</i> | <.0001*                            | <.0001*   | 0.02*     | 0.74      | 0.68         | 0.57         | 0.57         | 0.44         | 0.03*        | 0.75         |
| Total terpenes               | Coefficient    | 1.08                               | 0.2       | 0.08      | 0.001     | -0.01        | -0.02        | 0.02         | -0.03        | -0.1         | 0.03         |

|       |                |         |         |       |      |       |       |       |       |       |      |
|-------|----------------|---------|---------|-------|------|-------|-------|-------|-------|-------|------|
|       | <i>p value</i> | <.0001* | 0.0005* | 0.13  | 0.98 | 0.91  | 0.78  | 0.8   | 0.45  | 0.04* | 0.51 |
| Yield | Coefficient    | 28.1    | 4.01    | 2.64  | 0.47 | -0.21 | -0.29 | -0.18 | -2.01 | -2.49 | 0.85 |
|       | <i>p value</i> | <.0001* | 0.0014* | 0.02* | 0.67 | 0.88  | 0.83  | 0.89  | 0.06  | 0.02* | 0.4  |

---

Effects are statistically significant if *p value* \* < 0.05

**Table S4.** Microwave-assisted extraction of cannabis using model F (sample (g) solvent (g) <sup>-1</sup> and extraction temperature (°C) as independent parameters).

| Response/dependent variables |                | Regression model effect parameters |                |                |                 |                 |                 |
|------------------------------|----------------|------------------------------------|----------------|----------------|-----------------|-----------------|-----------------|
|                              |                | Intercept                          | Linear         |                | Interaction     | Quadratic       |                 |
|                              |                | β <sub>0</sub>                     | β <sub>1</sub> | β <sub>4</sub> | β <sub>14</sub> | β <sub>11</sub> | β <sub>44</sub> |
| THC                          | Coefficient    | 0.63                               | 0.05           | 0.25           | -0.01           | -0.11           | 0.09            |
|                              | <i>p value</i> | <.0001*                            | 0.37           | 0.001*         | 0.89            | 0.07            | 0.14            |
| THCA                         | Coefficient    | 17.18                              | 4.24           | 0.35           | 0.02            | -2.03           | 0.24            |
|                              | <i>p value</i> | <.0001*                            | 0.001*         | 0.72           | 0.98            | 0.04*           | 0.8             |
| Total THC                    | Coefficient    | 15.7                               | 3.78           | 0.55           | 0.01            | -1.89           | 0.3             |
|                              | <i>p value</i> | <.0001*                            | 0.001*         | 0.54           | 0.96            | 0.04*           | 0.73            |
| CBG                          | Coefficient    | 0.09                               | 0.02           | 0.01           | -0.001          | -0.01           | 0.002           |
|                              | <i>p value</i> | <.0001*                            | 0.001*         | 0.32           | 0.85            | 0.06            | 0.61            |
| CBGA                         | Coefficient    | 0.25                               | 0.06           | 0.01           | 0.01            | -0.03           | 0.01            |
|                              | <i>p value</i> | <.0001*                            | 0.001*         | 0.58           | 0.8             | 0.06            | 0.66            |
| Total CBG                    | Coefficient    | 0.3                                | 0.08           | 0.01           | 0.004           | -0.04           | 0.01            |
|                              | <i>p value</i> | <.0001*                            | 0.001*         | 0.46           | 0.87            | 0.05            | 0.63            |
| THCVA                        | Coefficient    | 0.96                               | 0.25           | 0.02           | 0.01            | -0.11           | 0.01            |
|                              | <i>p value</i> | <.0001*                            | 0.0004*        | 0.67           | 0.92            | 0.06            | 0.87            |
| CBCA                         | Coefficient    | 0.34                               | 0.08           | 0.01           | 0.001           | -0.04           | 0.002           |
|                              | <i>p value</i> | <.0001*                            | 0.001*         | 0.69           | 0.97            | 0.05            | 0.9             |
| Total terpenes               | Coefficient    | 0.93                               | 0.16           | 0.03           | 0.07            | -0.14           | -0.02           |

|       |                |         |         |      |       |         |       |
|-------|----------------|---------|---------|------|-------|---------|-------|
|       | <i>p value</i> | <.0001* | 0.02*   | 0.67 | 0.38  | 0.03*   | 0.77  |
| Yield | Coefficient    | 24.24   | 5.32    | 0.17 | -0.37 | -3.96   | -0.16 |
|       | <i>p value</i> | <.0001* | <.0001* | 0.76 | 0.61  | <.0001* | 0.76  |

---

Effects are statistically significant if *p value* \* < 0.05



**Table S5.** Microwave-assisted extraction of cannabis using model G (sample (g) solvent (g) <sup>-1</sup> and extraction time (min) as independent parameters).

| Response/dependent variables |                | Regression model effect parameters |           |           |              |              |              |
|------------------------------|----------------|------------------------------------|-----------|-----------|--------------|--------------|--------------|
|                              |                | Intercept                          | Linear    |           | Interaction  | Quadratic    |              |
|                              |                | $\beta_0$                          | $\beta_1$ | $\beta_2$ | $\beta_{12}$ | $\beta_{11}$ | $\beta_{22}$ |
| THC                          | Coefficient    | 0.67                               | 0.05      | 0.03      | 0.14         | -0.11        | 0.04         |
|                              | <i>p value</i> | <.0001*                            | 0.54      | 0.71      | 0.22         | 0.19         | 0.67         |
| THCA                         | Coefficient    | 17.26                              | 4.24      | 0.64      | 2.12         | -2.04        | 0.14         |
|                              | <i>p value</i> | <.0001*                            | 0.0002*   | 0.46      | 0.07         | 0.03*        | 0.86         |
| Total THC                    | Coefficient    | 15.81                              | 3.78      | 0.59      | 2            | -1.9         | 0.16         |
|                              | <i>p value</i> | <.0001*                            | 0.0003*   | 0.46      | 0.07         | 0.02*        | 0.84         |
| CBG                          | Coefficient    | 0.09                               | 0.02      | 0.003     | 0.01         | -0.01        | 0.003        |
|                              | <i>p value</i> | <.0001*                            | 0.0004*   | 0.43      | 0.07         | 0.03*        | 0.57         |
| CBGA                         | Coefficient    | 0.25                               | 0.06      | 0.01      | 0.03         | -0.03        | 0.004        |
|                              | <i>p value</i> | <.0001*                            | 0.0003*   | 0.33      | 0.07         | 0.03*        | 0.72         |
| Total CBG                    | Coefficient    | 0.31                               | 0.08      | 0.01      | 0.04         | -0.04        | 0.004        |
|                              | <i>p value</i> | <.0001*                            | 0.0002*   | 0.38      | 0.06         | 0.03*        | 0.77         |
| THCVA                        | Coefficient    | 0.96                               | 0.25      | 0.05      | 0.12         | -0.11        | 0.01         |
|                              | <i>p value</i> | <.0001*                            | 0.0001*   | 0.32      | 0.08         | 0.03*        | 0.86         |
| CBCA                         | Coefficient    | 0.34                               | 0.08      | 0.01      | 0.05         | -0.04        | 0.004        |
|                              | <i>p value</i> | <.0001*                            | 0.0002*   | 0.4       | 0.06         | 0.03*        | 0.8          |
| Total terpenes               | Coefficient    | 0.92                               | 0.16      | 0.05      | 0.1          | -0.14        | -0.001       |

|       |                |         |         |       |      |         |      |
|-------|----------------|---------|---------|-------|------|---------|------|
|       | <i>p value</i> | <.0001* | 0.01*   | 0.38  | 0.18 | 0.02*   | 0.98 |
| Yield | Coefficient    | 23.81   | 5.32    | -0.21 | 0.61 | -3.91   | 0.4  |
|       | <i>p value</i> | <.0001* | <.0001* | 0.69  | 0.39 | <.0001* | 0.44 |
